# Supplementary figures and images for: [Retracted] Transcriptome Comparison of Brain and Kidney Endothelial Cells in Homeostasis
Source: Hindawi journal article supplement (doi:10.1155/2022/5239255), 2022-01-01

Supplementary Figure 3

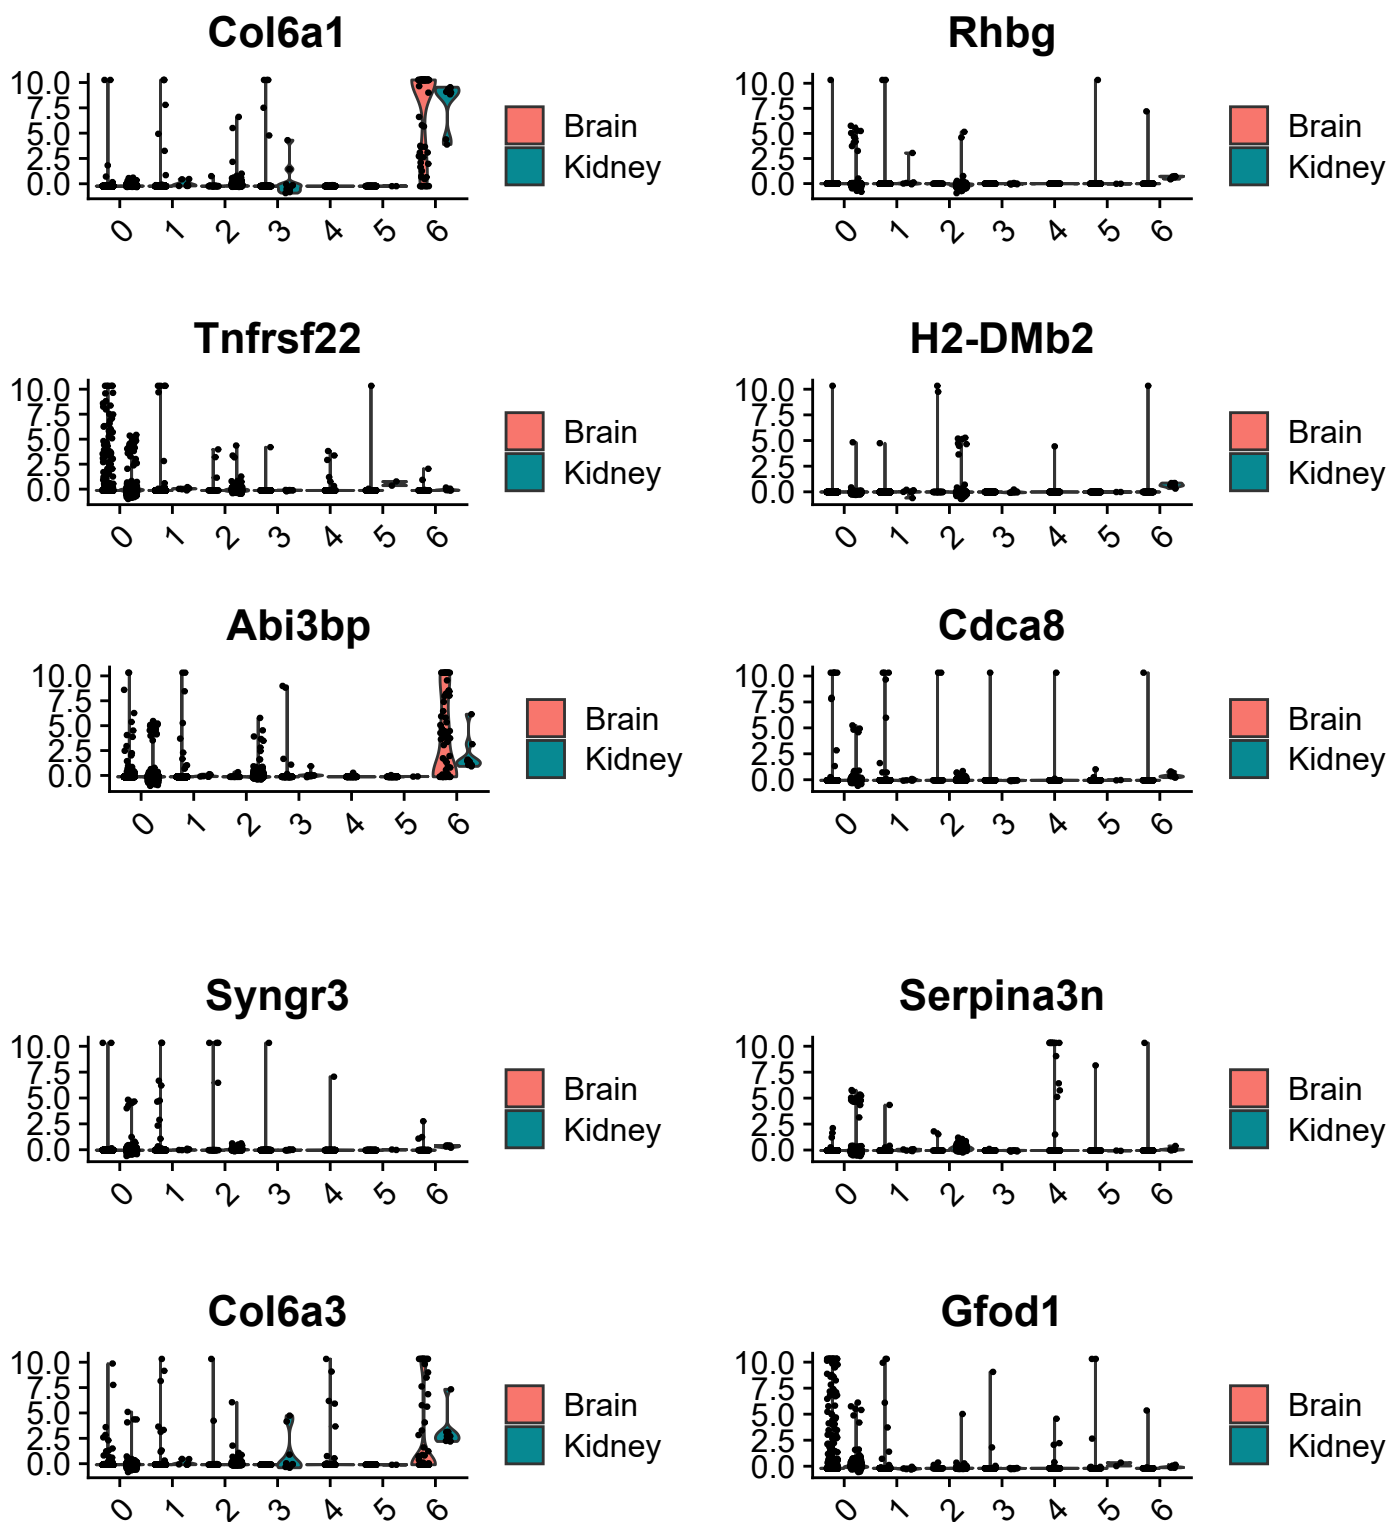

Supplement: f3 [file 5239255.f3.pdf]
